# Supplementary material for: Effect of water on size-controllable synthesis of mesoporous Fe3O4 microspheres and their applications in waste water treatment
Source: Royal Society of Chemistry journal article supplement (doi:10.1039/c3ce26971j), 2013-01-01
Supplement: c3ce26971j.pdf [file c3ce26971j.pdf]

# Effect of water on size-controllable synthesis of mesoporous Fe<sub>3</sub>O<sub>4</sub> microspheres and their applications in waste water treatment

*Dunpu Zhang, Chunhua Lu\*, Yaru Ni, Zhongzi Xu, Wenbin Zhang*

State Key Laboratory of Materials-Orient Chemical Engineering, College of Materials Science and Engineering, Nanjing University of Technology, Nanjing 210009, PR China

## **Author information**

Corresponding author:

\**Chunhua Lu*, E-mail address: njlch2005@163.com, Tel.:+86 25 83587252, Fax: +86 25 83587220.

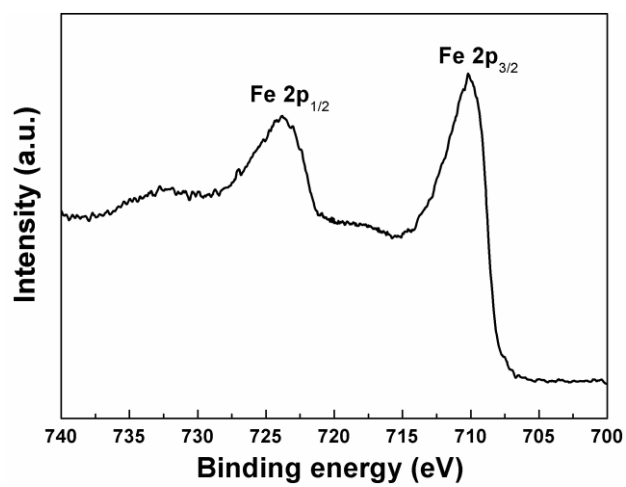

Fig. S1 XPS spectra of the typical Fe<sub>3</sub>O<sub>4</sub> with E/W=50

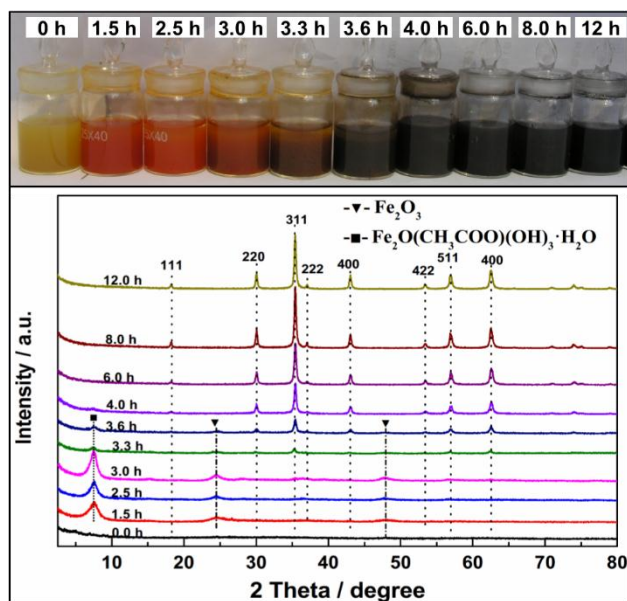

Fig. S2 XRD patterns and photography of precursors prepared with different treatment time.

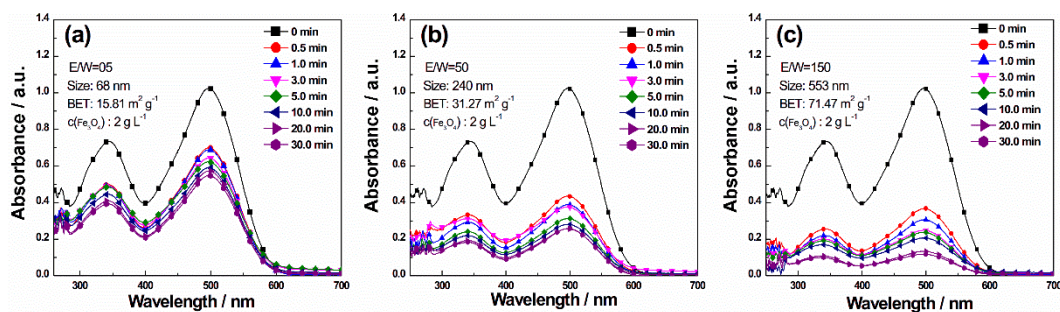

Fig. S3 UV-vis absorption spectra at different time for  $\text{Fe}_3\text{O}_4$  microspheres with particle size of: (a) 68 nm, (b) 240 nm, (c) 553 nm.

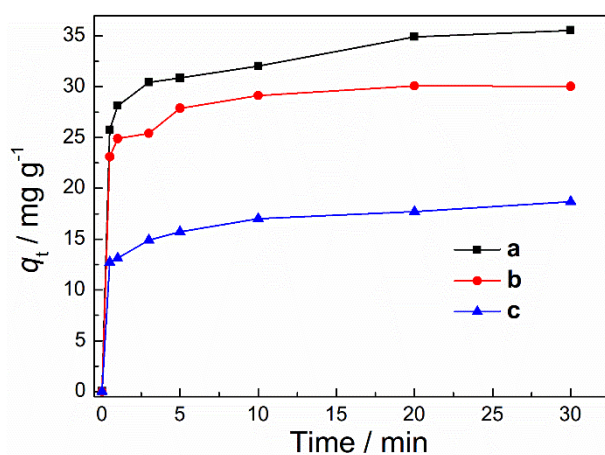

Fig. S4 Calculated adsorption capacities for  $\text{Fe}_3\text{O}_4$  microspheres with different size: (a) 553 nm; (b) 240 nm; (c) 68 nm.

Table S1 Equilibrium adsorption capacity for 553 nm Fe<sub>3</sub>O<sub>4</sub> microspheres under different concentration of Congo red (CR)

| <b>Dosage of Fe<sub>3</sub>O<sub>4</sub></b><br><b>/ g L<sup>-1</sup></b> | <b>Concentration of CR solvent</b><br><b>/ mg L<sup>-1</sup></b> | <b>Adsorption capacity</b><br><b>/ mg g<sup>-1</sup></b> |
|---------------------------------------------------------------------------|------------------------------------------------------------------|----------------------------------------------------------|
| 2                                                                         | 120                                                              | 41.83                                                    |
| 2                                                                         | 100                                                              | 42.18                                                    |
| 2                                                                         | 90                                                               | 40.51                                                    |
| 2                                                                         | 80                                                               | 35.54                                                    |
| 2                                                                         | 70                                                               | 32.94                                                    |
| 2                                                                         | 60                                                               | 29.48                                                    |

### Freundlich model:

Freundlich equation can be expressed as follow:

$$\log q_e = \log K_F + \frac{1}{n} \log c_e \quad (1)$$

Where  $c_e$  is equilibrium concentration of CR in solution ( $\text{mg L}^{-1}$ ),  $q_e$  is the adsorption capacity of CR adsorbed at equilibrium ( $\text{mg g}^{-1}$ ),  $K_F$  is the Freundlich constant ( $\text{mg}^{1-(1/n)} \text{L}^{1/n} \text{g}^{-1}$ ) and  $n$  is the heterogeneous factor. The  $K_F$  and  $n$  can be obtained from intercept and slope of the linear plot between  $\log c_e$  and  $\log q_e$ .

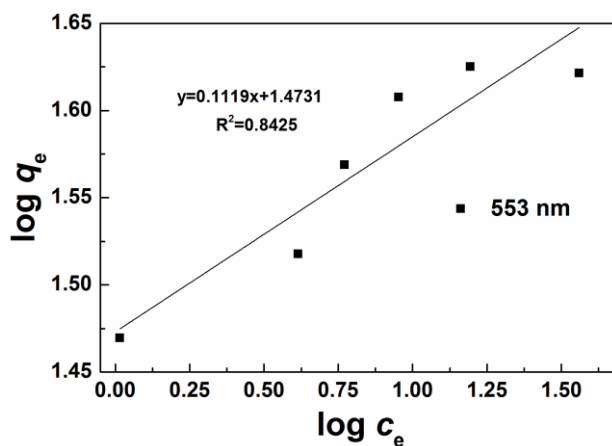

Fig. S5 Freundlich isotherm for CR adsorption onto 553 nm Fe<sub>3</sub>O<sub>4</sub> microspheres.

Table S2 Adsorption isotherm constants calculated from Freundlich model

| Sample | Freundlich isotherm constants                            |     |        |
|--------|----------------------------------------------------------|-----|--------|
|        | $K_F / \text{mg}^{1-(1/n)} \text{L}^{1/n} \text{g}^{-1}$ | $n$ | $R^2$  |
| 553 nm | 29.72                                                    | 8.9 | 0.8425 |

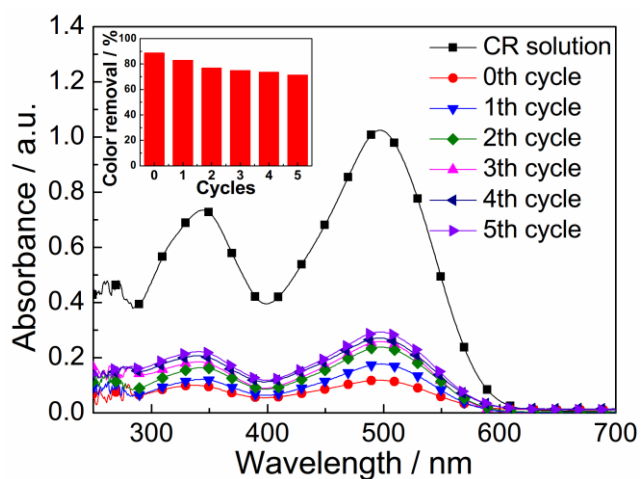

Fig. S6 The UV-vis absorption spectras and color removal efficiencies of the regenerated Fe<sub>3</sub>O<sub>4</sub> microspheres after different cycles.

The Fe<sub>3</sub>O<sub>4</sub> microspheres with CR are regenerated by combustion at 400 °C for 1 h under protection of N<sub>2</sub> flow.
